# Supplementary material
Source: PubMed Central journal article supplement (PMC5131798)

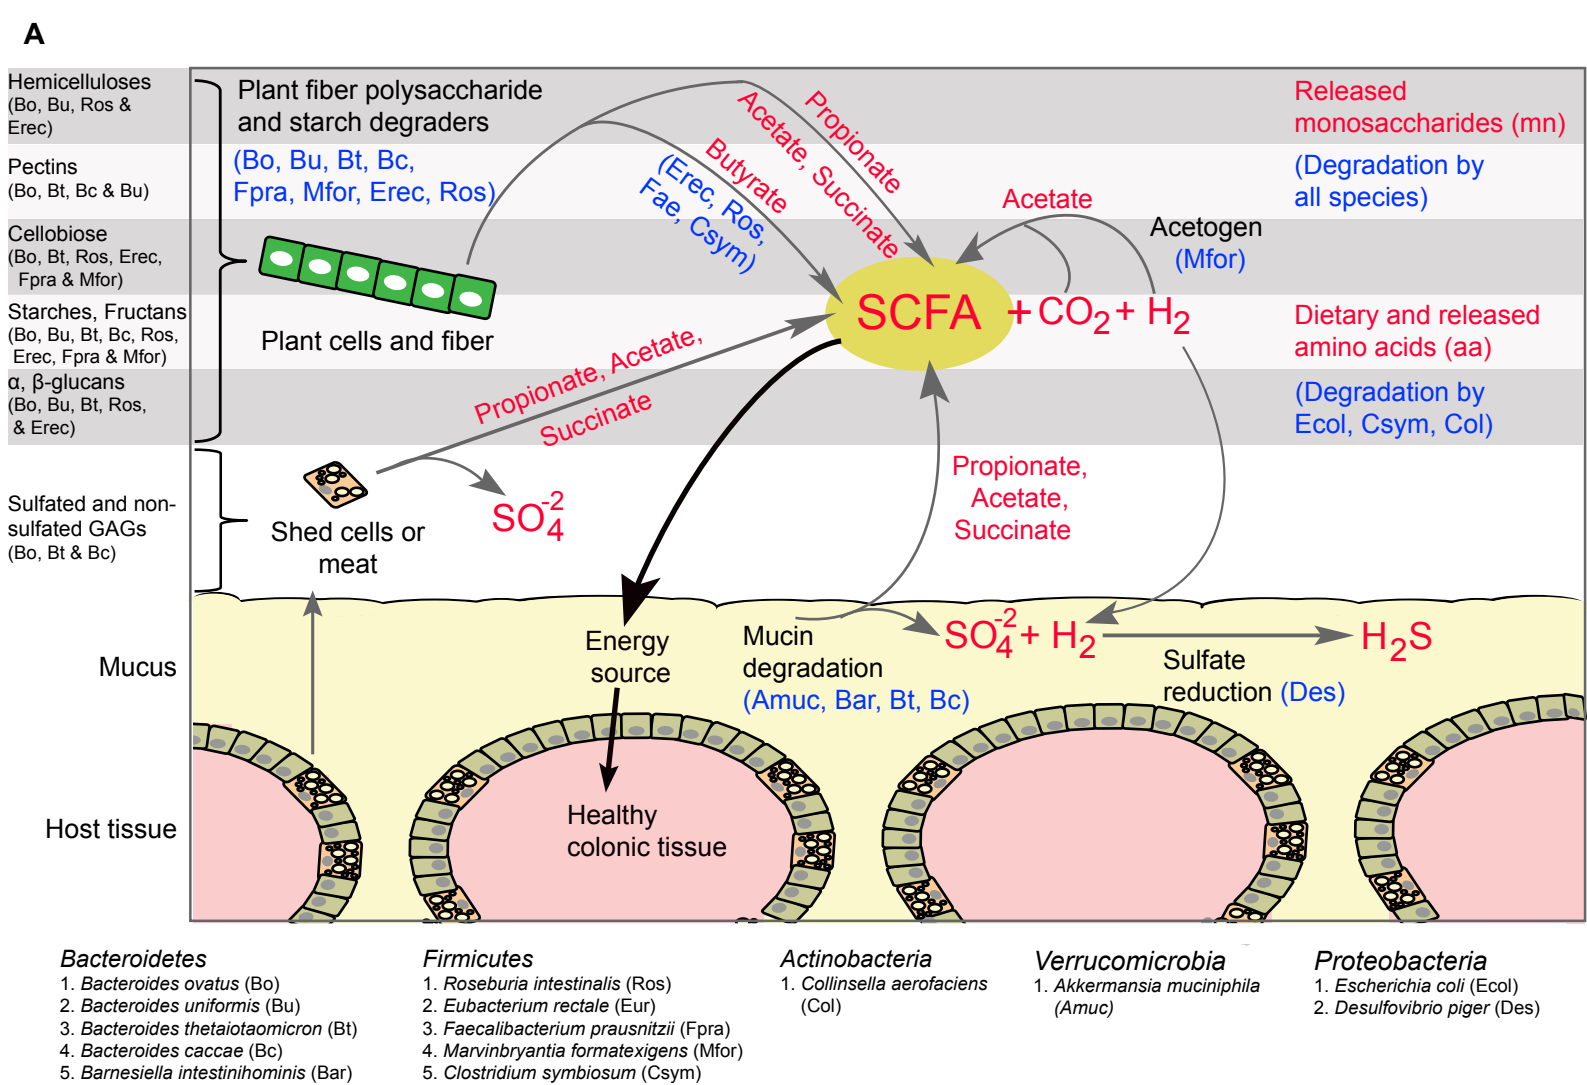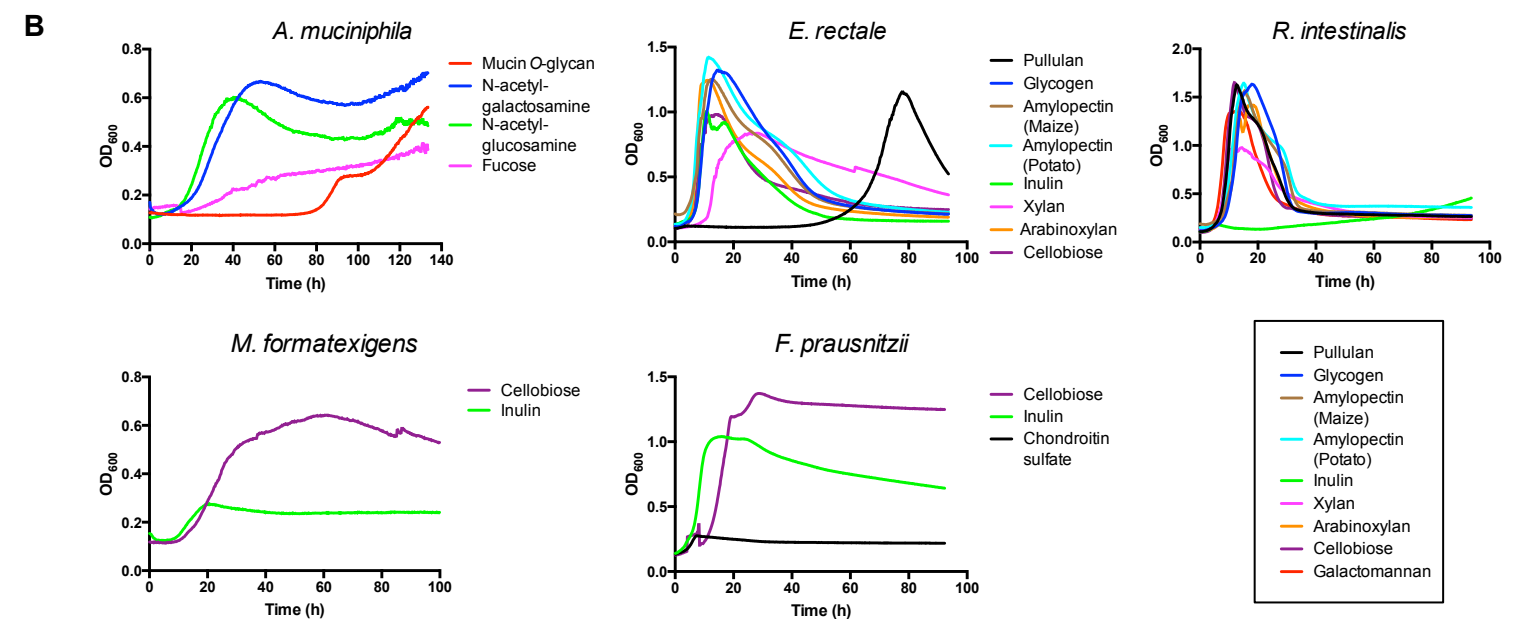

**Figure S1**

Supplement: NIHMS826124-supplement-1.pdf [file NIHMS826124-supplement-1.pdf]

**By experiment**

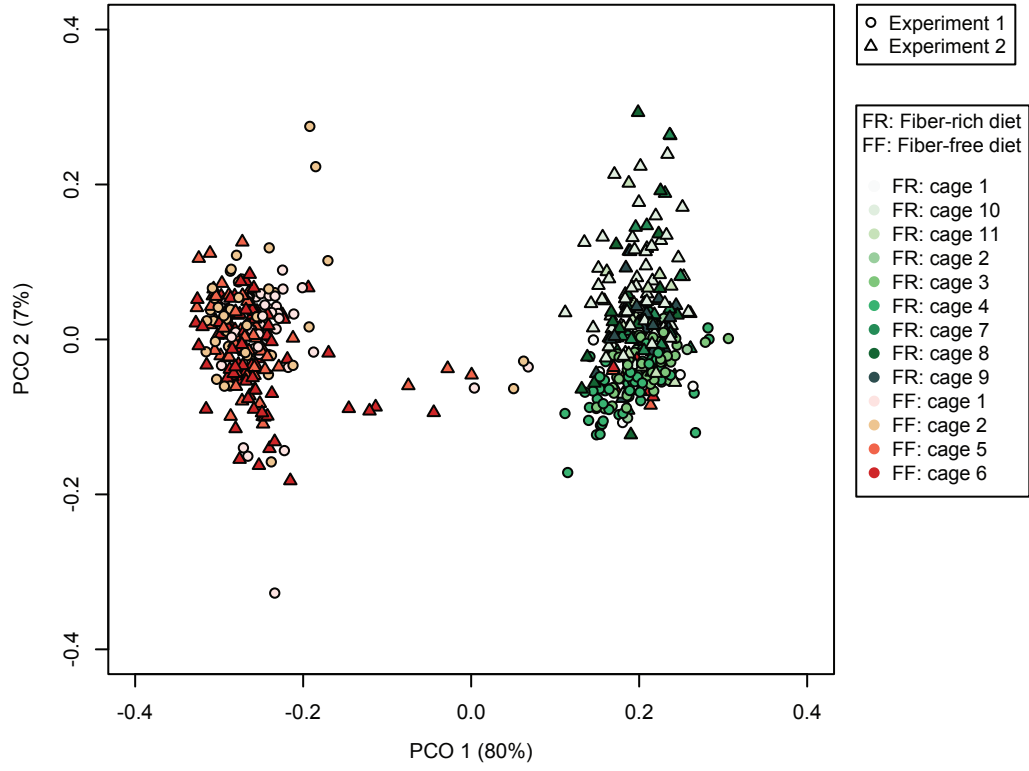

**By sex**

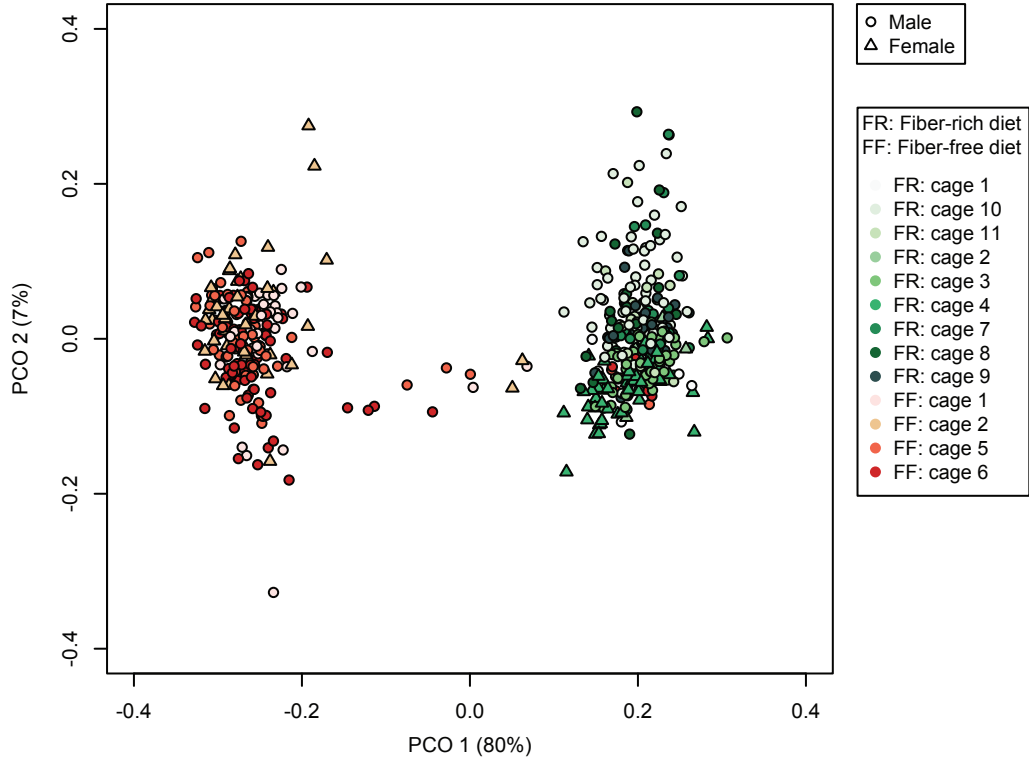

**Figure S2**

Supplement: NIHMS826124-supplement-2.pdf [file NIHMS826124-supplement-2.pdf]

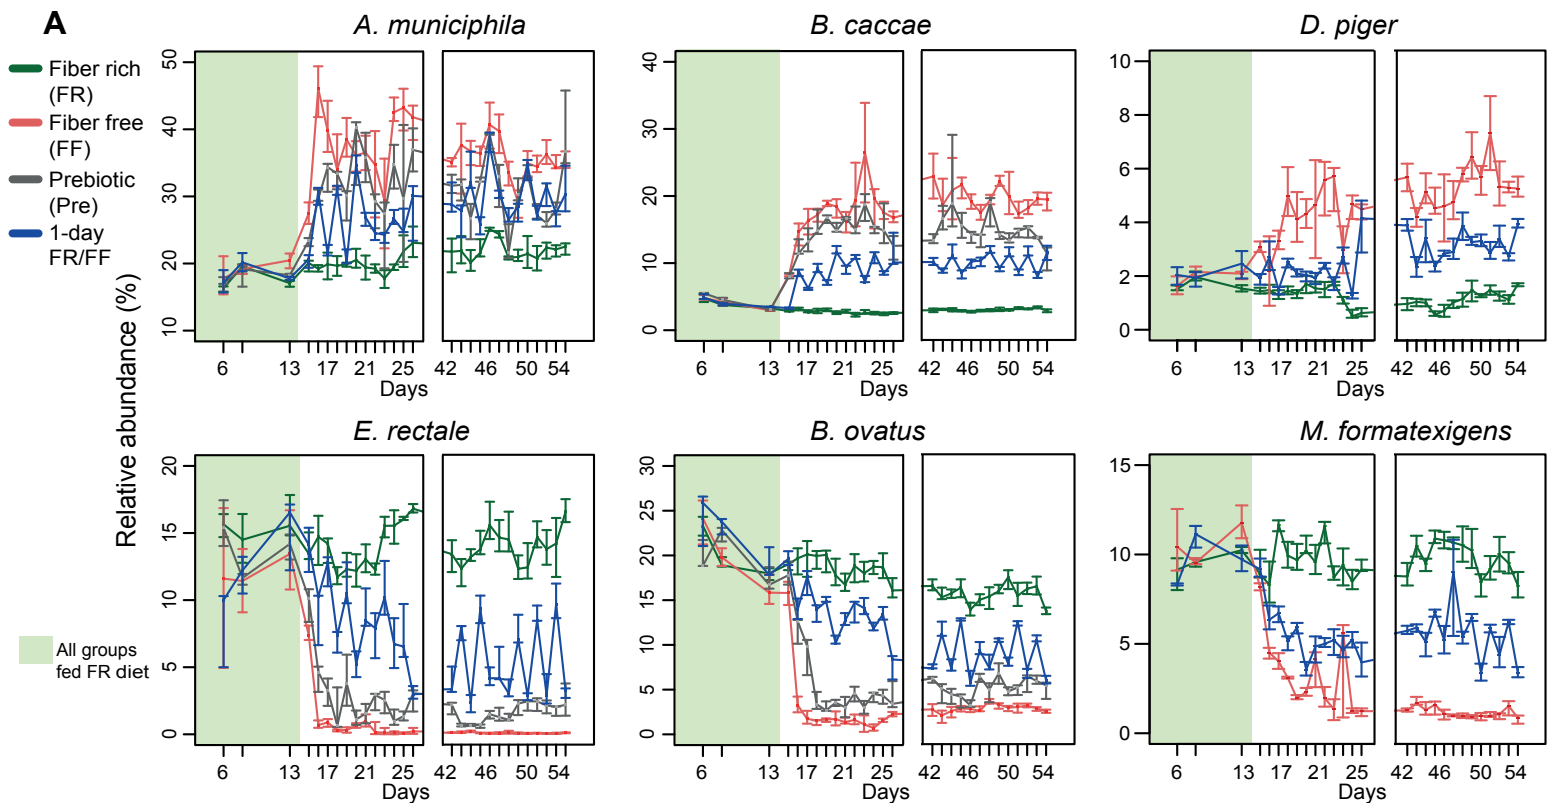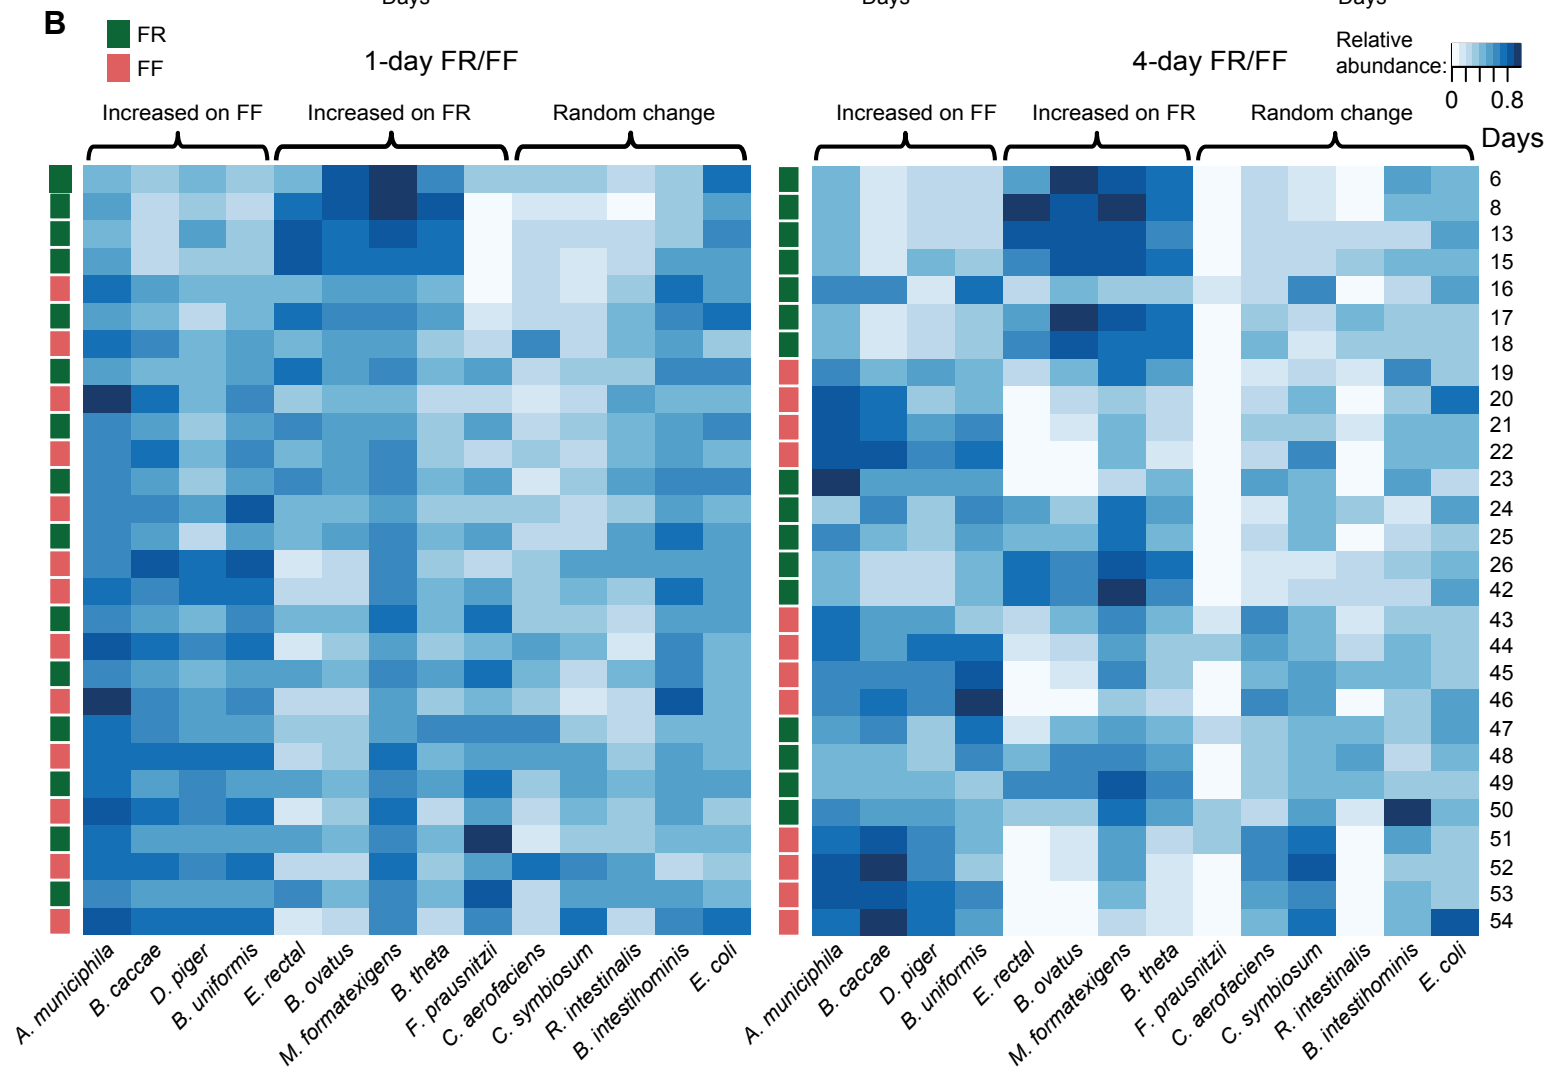

Figure S3

Supplement: NIHMS826124-supplement-3.pdf [file NIHMS826124-supplement-3.pdf]

### A *B. caccae*

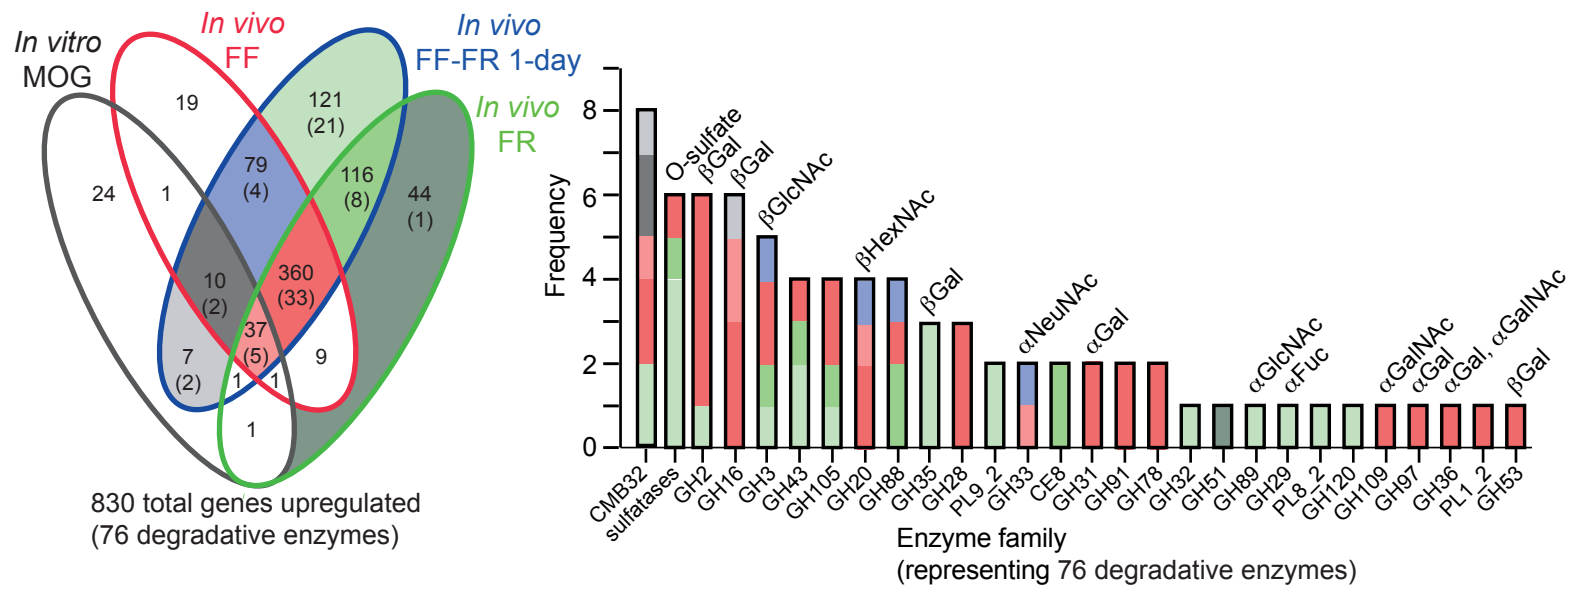

### B *A. muciniphila*

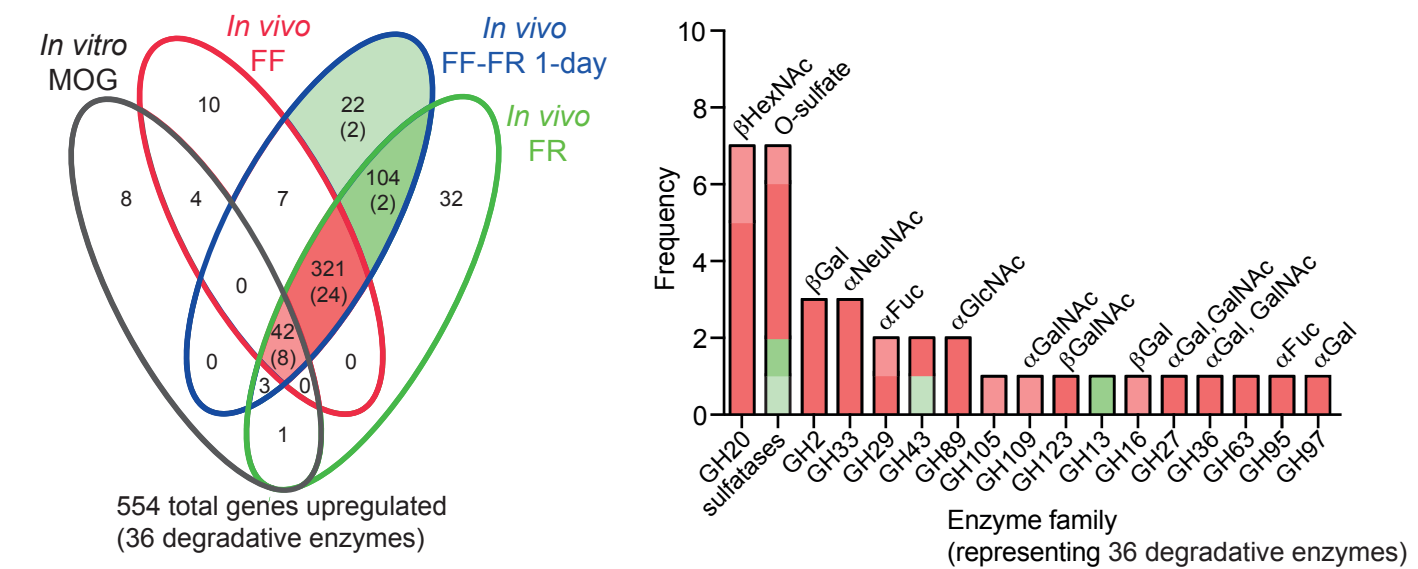

### C

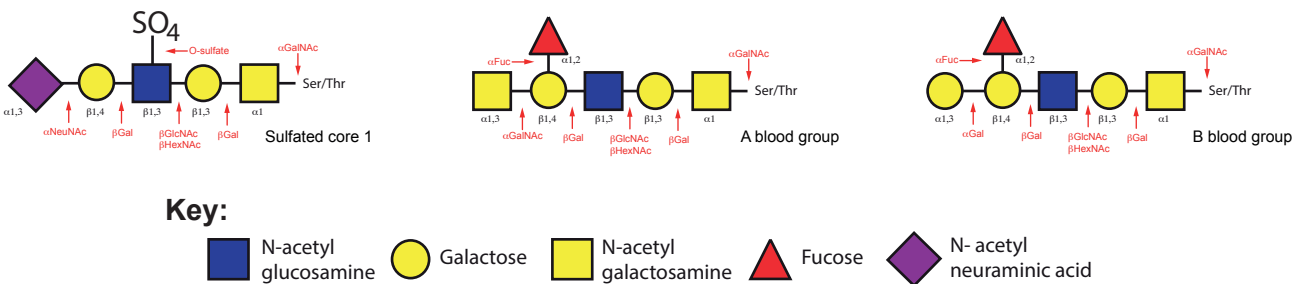

Figure S4

Supplement: NIHMS826124-supplement-4.pdf [file NIHMS826124-supplement-4.pdf]

**A**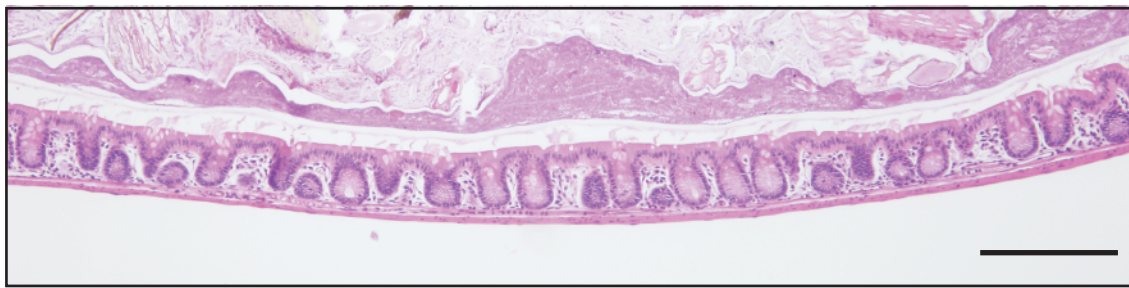

Rectum  
Fiber-rich (FR) diet

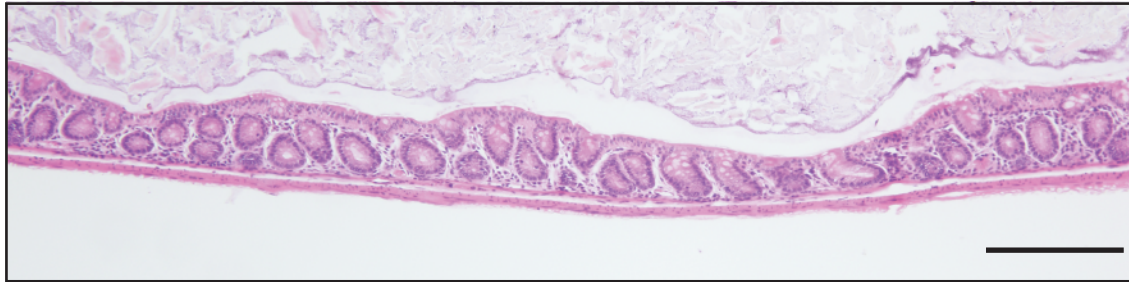

Rectum  
Fiber-free (FF) diet

**B**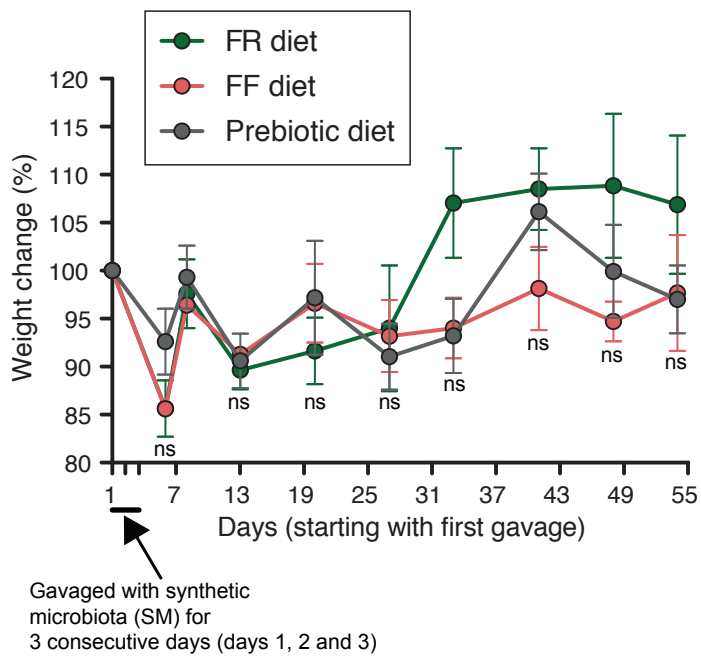**C**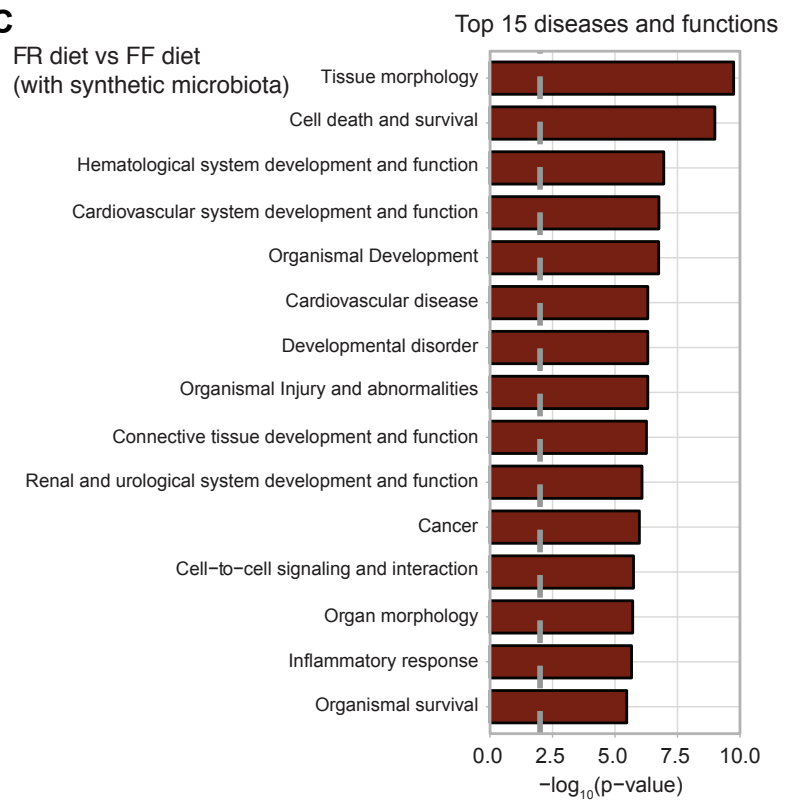**Figure S5**

Supplement: NIHMS826124-supplement-5.pdf [file NIHMS826124-supplement-5.pdf]

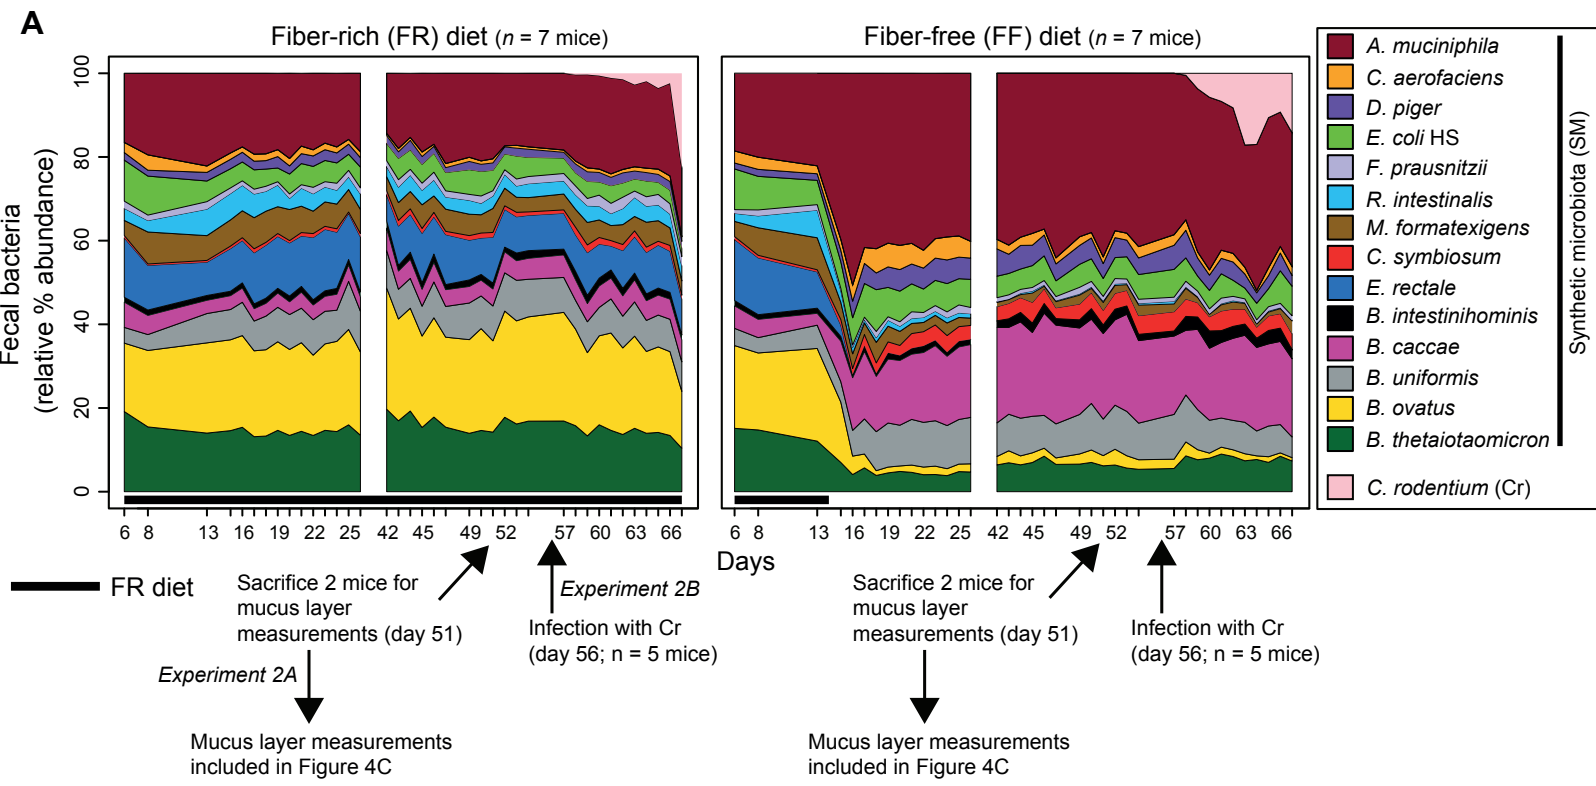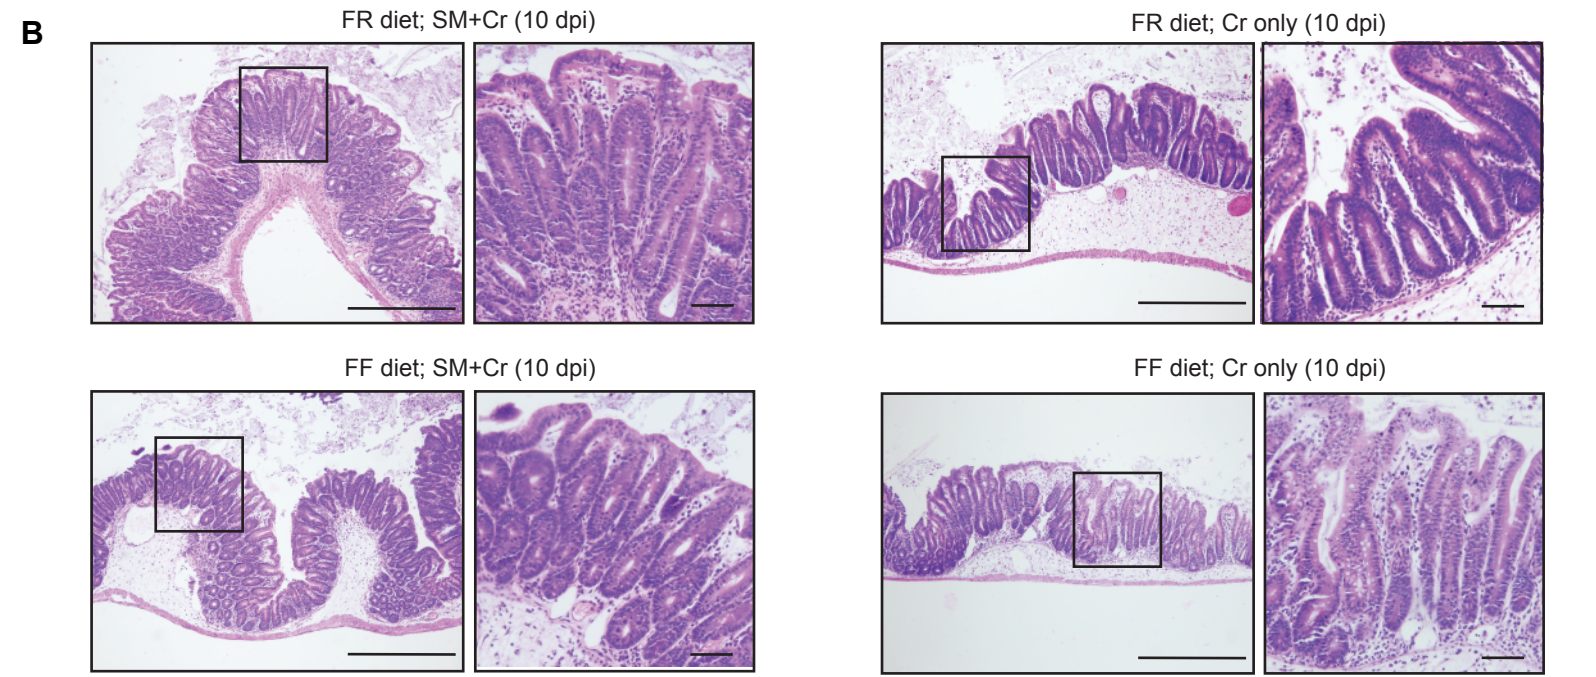

**Figure S6**

Supplement: NIHMS826124-supplement-6.pdf [file NIHMS826124-supplement-6.pdf]

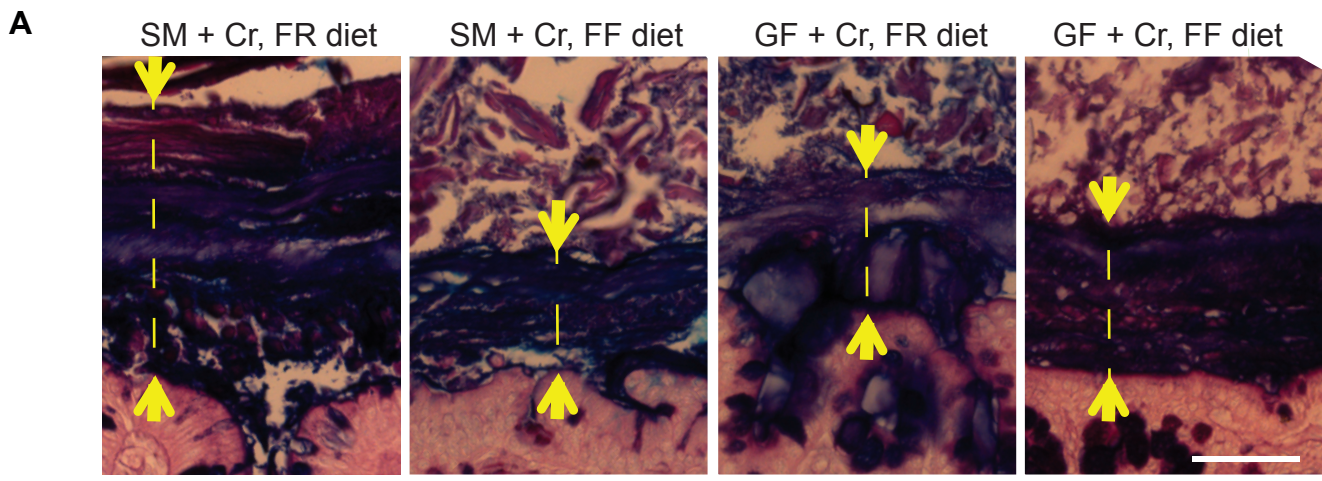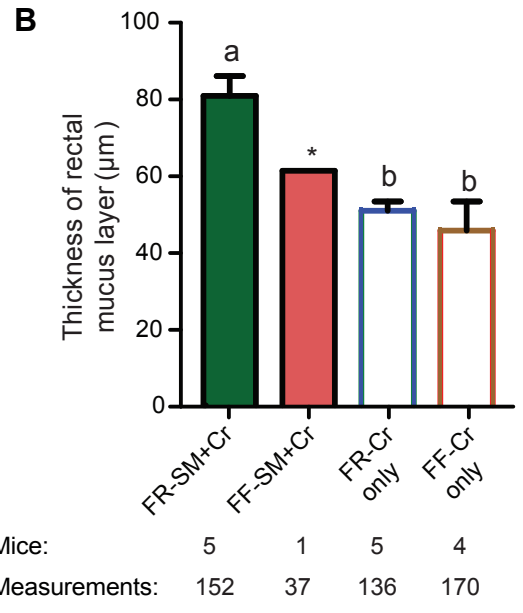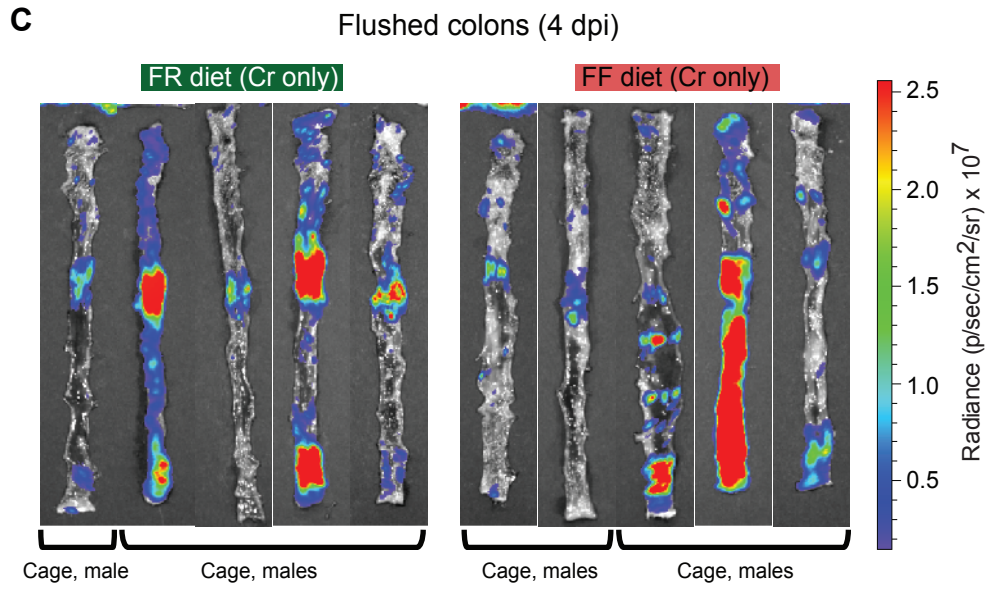

**Figure S7**

Supplement: NIHMS826124-supplement-7.pdf [file NIHMS826124-supplement-7.pdf]
